# Supplementary material for: Development and Evaluation of a Natural Language Processing Annotation Tool to Facilitate Phenotyping of Cognitive Status in Electronic Health Records: Diagnostic Study
Source: PubMed Central journal article supplement (PMC9472045; doi:10.2196/40384), 2022-08-30

## Preparation

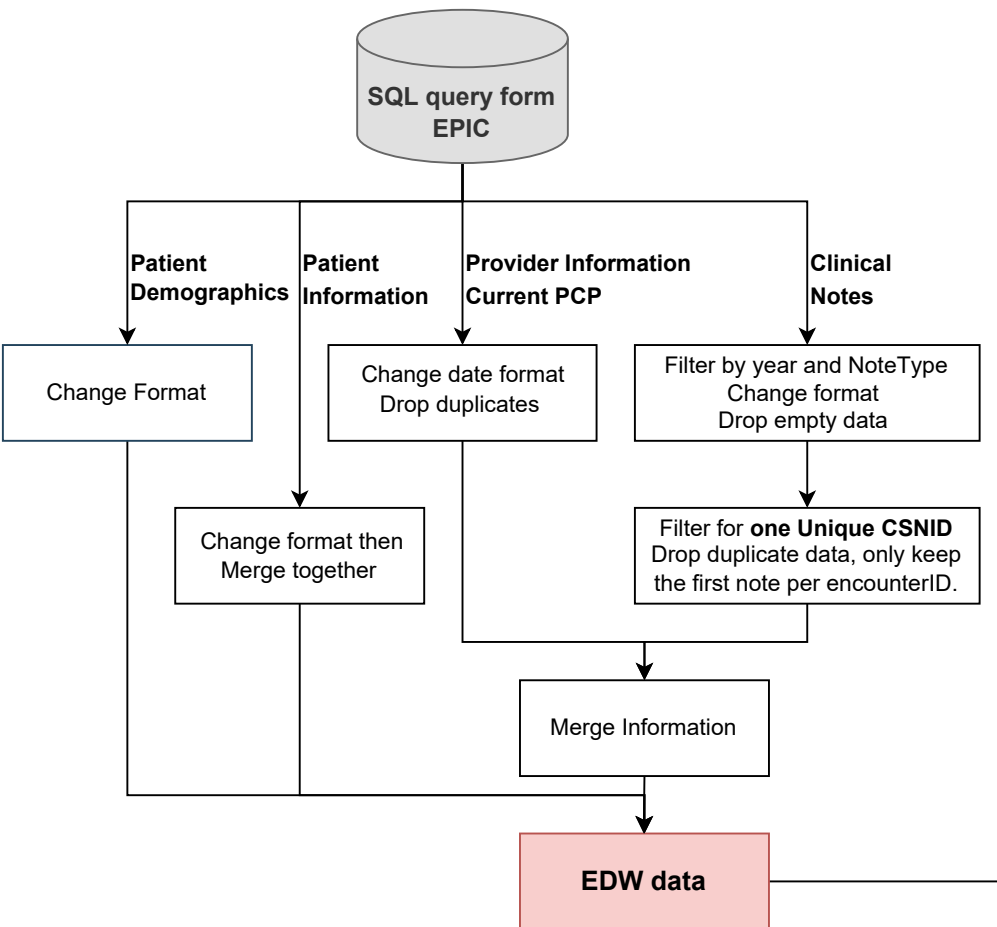

## Pre-Processing Pipeline

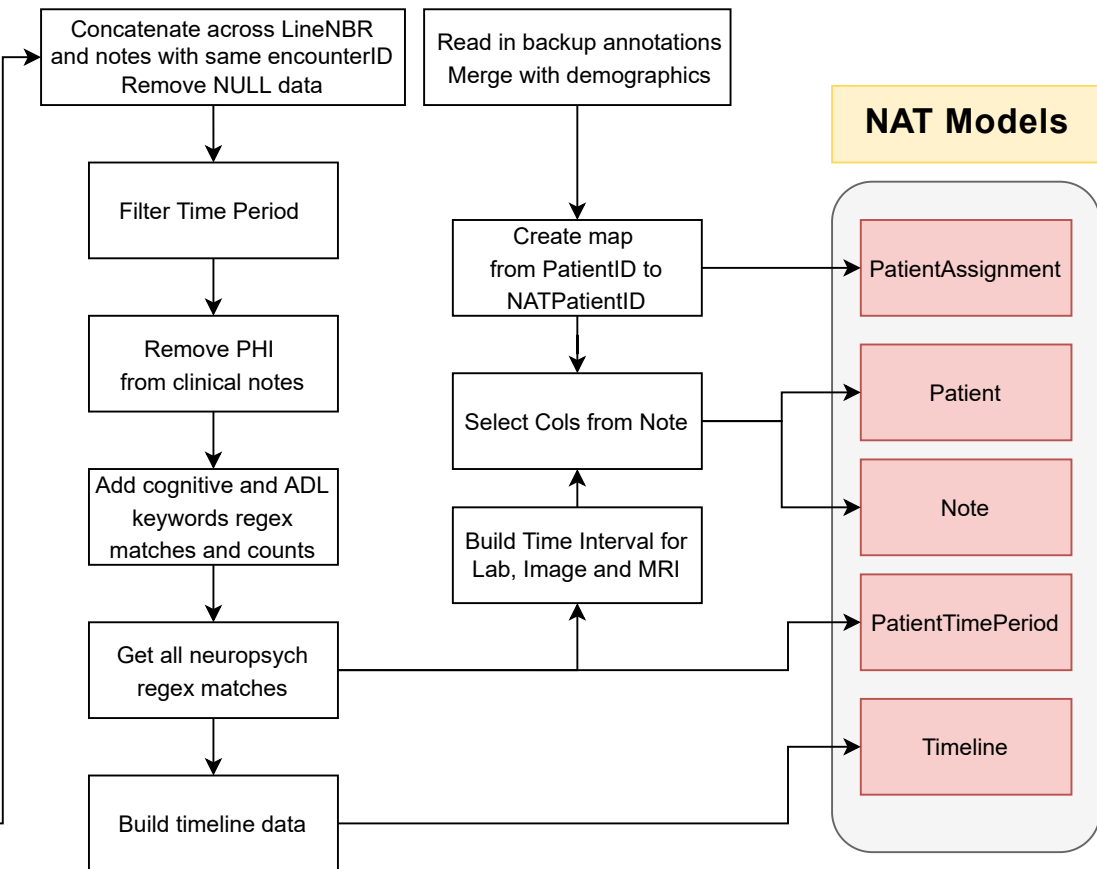

Supplement: jmir_v24i8e40384_app1.pdf [file jmir_v24i8e40384_app1.pdf]
